# Supplementary material for: Financial Toxicity Among Patients With Breast Cancer Worldwide: A Systematic Review and Meta-analysis
Source: PubMed Central journal article supplement (PMC9909501; doi:10.1001/jamanetworkopen.2022.55388), 2023-02-08
Supplement: jamanetwopen-e2255388-s001.pdf [file jamanetwopen-e2255388-s001.pdf]

## Supplemental Online Content

Ehsan AN, Wu CA, Minasian A, et al. Financial toxicity among patients with breast cancer worldwide: a systematic review and meta-analysis. *JAMA Netw Open*. 2023;6(2):e2255388. doi:10.1001/jamanetworkopen.2022.55388

**eAppendix.** Search Strategy

**eFigure 1.** Forest Plot for Financial Toxicity Rate, Subgrouped by Study Quality Ratings Among High-Income Countries (HICs)

**eFigure 2.** Funnel Plot of Standard Error by Logit Event Rate for Studies Reporting High-Income Countries (HICs)

This supplemental material has been provided by the authors to give readers additional information about their work.

## **eAppendix. Search Strategy**

Wu Out of Pocket Finances Breast Cancer Search Strategy

Last Updated: February 9, 2021

What is the out-of-pocket financial burden of breast cancer care in high-, middle-, and low-income countries, and what interventions have been implemented to address this burden?

Citation Pull: February 9, 2021

PubMed: 2240

Embase (Elsevier): 8231

Global Index Medicus: 61

Global Health (EBSCO): 554

Direct import into Covidence

Embase – 8176 (55 duplicates)

PubMed – 547 (1693 duplicates)

Global Index Medicus – 46 (15 duplicates)

Global Health – 239 (315 duplicates)

Total number of articles to review in Title/Abstract Screening: 9008

Concept 1: Breast Cancer

Synonyms

breast cancer\* OR breast neoplasm\* OR breast tumour\* OR breast tumor\* OR breast carcinoma\* OR carcinoma of the breast OR carcinoma in situ OR mammary cancer\* OR cancer of breast OR cancer of the breast

Concept 2: Out of Pocket Financial Burden

Synonyms

Financial Stress\* OR Financial Pressure\* OR Financial Hardship\* OR Financial Challenges\* OR Financial burden\* OR health expenditure\* OR direct expenditure\* OR out-of-pocket expenditure\* OR out-of pocket expenditure\* OR out of pocket expenditure\* OR out-of-pocket expense\* OR out-of pocket expense\* OR out of pocket expense\* OR out-of-pocket cost\* OR out-of pocket cost\* OR out of pocket cost\* OR out-of-pocket payment\* OR out-of pocket payment\* OR out of pocket payment\* OR out-of-pocket spending OR out-of pocket spending OR out of pocket spending OR indirect expenditure\* OR expenditure\* OR indirect cost\* OR fear of cost\* OR cost of treatment OR capital expenditure\* OR direct service cost\* OR health expenditure\* OR healthcare expenditure\* OR health care expenditure\* OR health care cost\* OR healthcare cost\* OR medical care cost\* OR health cost\* OR treatment cost\*

PubMed

Concept 1: Breast Cancer  
Controlled Vocabulary  
"Breast Neoplasms"[Mesh]

Concept 2: Out-of-Pocket Expenses  
Controlled Vocabulary  
"Health Care Costs"[Mesh] OR "Financial Stress"[Mesh] OR "Health Expenditures"[Mesh]

Concept 1 AND Concept 2

((("Breast Neoplasms"[Mesh]) OR (breast cancer\*[Title/Abstract] OR breast neoplasm\*[Title/Abstract] OR breast tumour\*[Title/Abstract] OR breast tumor\*[Title/Abstract] OR breast carcinoma\*[Title/Abstract] OR carcinoma of the breast[Title/Abstract] OR carcinoma in situ[Title/Abstract] OR mammary cancer\*[Title/Abstract] OR cancer of breast[Title/Abstract] OR cancer of the breast[Title/Abstract])) AND (("Health Care Costs"[Mesh] OR "Financial Stress"[Mesh] OR "Health Expenditures"[Mesh]) OR (Financial Stress\*[Title/Abstract] OR Financial Pressure\*[Title/Abstract] OR Financial Hardship\*[Title/Abstract] OR Financial Challenges\*[Title/Abstract] OR Financial burden\*[Title/Abstract] OR health expenditure\*[Title/Abstract] OR direct expenditure\*[Title/Abstract] OR out-of-pocket expenditure\*[Title/Abstract] OR out-of pocket expenditure\*[Title/Abstract] OR out of pocket expenditure\*[Title/Abstract] OR out-of-pocket expense\*[Title/Abstract] OR out-of pocket expense\*[Title/Abstract] OR out-of-pocket cost\*[Title/Abstract] OR out-of pocket cost\*[Title/Abstract] OR out of pocket cost\*[Title/Abstract] OR out-of-pocket payment\*[Title/Abstract] OR out-of pocket payment\*[Title/Abstract] OR out-of-pocket spending[Title/Abstract] OR out-of pocket spending[Title/Abstract] OR out of pocket spending[Title/Abstract] OR indirect expenditure\*[Title/Abstract] OR expenditure\*[Title/Abstract] OR indirect cost\*[Title/Abstract] OR fear of cost\*[Title/Abstract] OR cost of treatment[Title/Abstract] OR capital expenditure\*[Title/Abstract] OR direct service cost\*[Title/Abstract] OR health expenditure\*[Title/Abstract] OR healthcare expenditure\*[Title/Abstract] OR health care expenditure\*[Title/Abstract] OR health care cost\*[Title/Abstract] OR healthcare cost\*[Title/Abstract] OR medical care cost\*[Title/Abstract] OR health cost\*[Title/Abstract] OR treatment cost\*[Title/Abstract]))))

Results: 2240

EMBASE (Elsevier)  
Concept 1: Breast Cancer  
Controlled Vocabulary  
'breast cancer'/exp

Concept 2: Out-of-pocket expenses  
Controlled Vocabulary

'financial stress'/exp OR 'financial burden'/exp OR 'out of pocket cost'/exp OR 'out of pocket expenditure'/exp OR 'out of pocket payment'/exp OR 'out of pocket spending'/exp OR 'treatment cost'/exp OR 'financial hardship'/exp OR 'health care cost'/exp

Concept 1 AND Concept 2

('breast cancer'/exp OR ((breast\* NEAR/3 (cancer\* OR tumor\* OR tumour\* OR neoplasm\* OR adenocarcinoma\* OR carcinoma\* OR malignan\* OR 'in situ')):ti,ab,kw) OR 'breast cancer\*':ti,ab,kw OR 'breast neoplasm\*':ti,ab,kw OR 'breast tumour\*':ti,ab,kw OR 'breast tumor\*':ti,ab,kw OR 'breast carcinoma\*':ti,ab,kw OR 'carcinoma of the breast':ti,ab,kw OR 'carcinoma in situ':ti,ab,kw OR 'mammary cancer\*':ti,ab,kw OR 'cancer of breast':ti,ab,kw OR 'cancer of the breast':ti,ab,kw ) AND ('financial stress'/exp OR 'financial burden'/exp OR 'out of pocket cost'/exp OR 'out of pocket expenditure'/exp OR 'out of pocket payment'/exp OR 'out of pocket spending'/exp OR 'treatment cost'/exp OR 'financial hardship'/exp OR 'health care cost'/exp OR 'financial stress\*':ti,ab,kw OR 'financial pressure\*':ti,ab,kw OR 'financial hardship\*':ti,ab,kw OR 'financial challenges\*':ti,ab,kw OR 'financial burden\*':ti,ab,kw OR 'direct expenditure\*':ti,ab,kw OR 'out-of-pocket expenditure\*':ti,ab,kw OR 'out-of-pocket expenditure\*':ti,ab,kw OR 'out-of-pocket expense\*':ti,ab,kw OR 'out-of-pocket expense\*':ti,ab,kw OR 'out-of-pocket expense\*':ti,ab,kw OR 'out-of-pocket cost\*':ti,ab,kw OR 'out-of-pocket cost\*':ti,ab,kw OR 'out of pocket cost\*':ti,ab,kw OR 'out-of-pocket payment\*':ti,ab,kw OR 'out-of-pocket payment\*':ti,ab,kw OR 'out of pocket payment\*':ti,ab,kw OR 'out-of-pocket spending':ti,ab,kw OR 'out-of-pocket spending':ti,ab,kw OR 'out of pocket spending':ti,ab,kw OR 'indirect expenditure\*':ti,ab,kw OR 'indirect expenditure\*':ti,ab,kw OR 'indirect cost\*':ti,ab,kw OR 'fear of cost\*':ti,ab,kw OR 'cost of treatment':ti,ab,kw OR 'capital expenditure\*':ti,ab,kw OR 'direct service cost\*':ti,ab,kw OR 'health expenditure\*':ti,ab,kw OR 'healthcare expenditure\*':ti,ab,kw OR 'health care expenditure\*':ti,ab,kw OR 'health care cost\*':ti,ab,kw OR 'healthcare cost\*':ti,ab,kw OR 'medical care cost\*':ti,ab,kw OR 'health cost\*':ti,ab,kw OR 'treatment cost\*':ti,ab,kw)

Results 8231

Global Health (EBSCO)

Concept 1: Breast Cancer

Controlled Vocabulary

DE "breast cancer"

Concept 2: Out-of-pocket expenses

Controlled Vocabulary

DE "health care costs"

Concept 1 AND Concept 2

(DE "breast cancer" OR AB ( breast cancer\* OR breast neoplasm\* OR breast tumour\* OR breast tumor\* OR breast carcinoma\* OR carcinoma of the breast OR carcinoma in situ OR mammary cancer\* OR cancer of breast OR cancer of the breast ) OR TI ( breast cancer\* OR breast neoplasm\* OR breast tumour\* OR breast tumor\* OR breast carcinoma\* OR carcinoma of the

breast OR carcinoma in situ OR mammary cancer\* OR cancer of breast OR cancer of the breast ) AND (DE "health care costs" OR AB ( Financial Stress\* OR Financial Pressure\* OR Financial Hardship\* OR Financial Challenges\* OR Financial burden\* OR health expenditure\* OR direct expenditure\* OR out-of-pocket expenditure\* OR out-of pocket expenditure\* OR out of pocket expenditure\* OR out-of-pocket expense\* OR out-of pocket expense\* OR out of pocket expense\* OR out-of-pocket cost\* OR out-of pocket cost\* OR out of pocket cost\* OR out-of-pocket payment\* OR out-of pocket payment\* OR out of pocket payment\* OR out-of-pocket spending OR out-of pocket spending OR out of pocket spending OR indirect expenditure\* OR expenditure\* OR indirect cost\* OR fear of cost\* OR cost of treatment OR capital expenditure\* OR direct service cost\* OR health expenditure\* OR healthcare expenditure\* OR health care expenditure\* OR health care cost\* OR healthcare cost\* OR medical care cost\* OR health cost\* OR treatment cost\* ) OR TI ( Financial Stress\* OR Financial Pressure\* OR Financial Hardship\* OR Financial Challenges\* OR Financial burden\* OR health expenditure\* OR direct expenditure\* OR out-of-pocket expenditure\* OR out-of pocket expenditure\* OR out of pocket expenditure\* OR out-of-pocket expense\* OR out-of pocket expense\* OR out of pocket expense\* OR out-of-pocket cost\* OR out-of pocket cost\* OR out of pocket cost\* OR out-of-pocket payment\* OR out-of pocket payment\* OR out of pocket payment\* OR out-of-pocket spending OR out-of pocket spending OR out of pocket spending OR indirect expenditure\* OR expenditure\* OR indirect cost\* OR fear of cost\* OR cost of treatment OR capital expenditure\* OR direct service cost\* OR health expenditure\* OR healthcare expenditure\* OR health care expenditure\* OR health care cost\* OR healthcare cost\* OR medical care cost\* OR health cost\* OR treatment cost\* ))

Results 554

Global Index Medicus

Concept 1 AND Concept 2

(tw:("breast cancer\*" OR "breast neoplasm\*" OR "breast tumour\*" OR "breast tumor\*" OR "breast carcinoma\*" OR "carcinoma of the breast" OR "carcinoma in situ" OR "mammary cancer\*" OR "cancer of breast " OR "cancer of the breast")) AND (tw:("Financial Stress\*" OR "Financial Pressure\*" OR "Financial Hardship\*" OR "Financial Challenges\*" OR "Financial burden\*" OR "health expenditure\*" OR "direct expenditure\*" OR "out-of-pocket expenditure\*" OR "out-of pocket expenditure\*" OR "out of pocket expenditure\*" OR "out-of-pocket expense\*" OR "out-of pocket expense\*" OR "out of pocket expense\*" OR "out-of-pocket cost\*" OR "out-of pocket cost\*" OR "out of pocket cost\*" OR "out-of-pocket payment\*" OR "out-of pocket payment\*" OR "out of pocket payment\*" OR "out-of-pocket spending" OR "out-of pocket spending" OR "out of pocket spending" OR "indirect expenditure\*" OR "expenditure\*" OR "indirect cost\*" OR "fear of cost\*" OR "cost of treatment" OR "capital expenditure\*" OR "direct service cost\*" OR "health expenditure\*" OR "healthcare expenditure\*" OR "health care expenditure\*" OR "health care cost\*" OR "healthcare cost\*" OR "medical care cost\*" OR "health cost\*" OR "treatment cost\*"))

Results 61

---

PubMed

Concept 1: Breast Cancer

Controlled Vocabulary

"Breast Neoplasms"[Mesh]

Synonyms

breast cancer\* OR breast neoplasm\* OR breast tumour\* OR breast tumor\* OR breast carcinoma\* OR carcinoma of the breast OR carcinoma in situ OR mammary cancer\* OR cancer of breast OR cancer of the breast

Syntax

("Breast Neoplasms"[Mesh]) OR (breast cancer\*[Title/Abstract] OR breast neoplasm\*[Title/Abstract] OR breast tumour\*[Title/Abstract] OR breast tumor\*[Title/Abstract] OR breast carcinoma\*[Title/Abstract] OR carcinoma of the breast[Title/Abstract] OR carcinoma in situ[Title/Abstract] OR mammary cancer\*[Title/Abstract] OR cancer of breast[Title/Abstract] OR cancer of the breast[Title/Abstract])

Concept 2: Out-of-Pocket Financial Burden

Controlled Vocabulary

"Financial Stress"[Mesh] OR "Health Expenditures"[Mesh]

Synonyms

Financial Stress\* OR Financial Pressure\* OR Financial Hardship\* OR Financial Challenges\* OR Financial burden\* OR health expenditure\* OR direct expenditure\* OR out-of-pocket expenditure\* OR out-of pocket expenditure\* OR out of pocket expenditure\* OR out-of-pocket expense\* OR out-of pocket expense\* OR out of pocket expense\* OR out-of-pocket cost\* OR out-of pocket cost\* OR out of pocket cost\* OR out-of-pocket payment\* OR out-of pocket payment\* OR out of pocket payment\* OR out-of-pocket spending OR out-of pocket spending OR out of pocket spending OR indirect expenditure\* OR expenditure\* OR indirect cost\* OR fear of cost\* OR cost of treatment

Syntax

("Financial Stress"[Mesh] OR "Health Expenditures"[Mesh]) OR (Financial Stress\*[Title/Abstract] OR Financial Pressure\*[Title/Abstract] OR Financial Hardship\*[Title/Abstract] OR Financial Challenges\*[Title/Abstract] OR Financial burden\*[Title/Abstract] OR health expenditure\*[Title/Abstract] OR direct expenditure\*[Title/Abstract] OR out-of-pocket expenditure\*[Title/Abstract] OR out-of pocket expenditure\*[Title/Abstract] OR out of pocket expenditure\*[Title/Abstract] OR out-of-pocket expense\*[Title/Abstract] OR out-of pocket expense\*[Title/Abstract] OR out of pocket expense\*[Title/Abstract] OR out-of-pocket cost\*[Title/Abstract] OR out-of pocket cost\*[Title/Abstract] OR out of pocket cost\*[Title/Abstract] OR out-of-pocket payment\*[Title/Abstract] OR out-of pocket payment\*[Title/Abstract] OR out of pocket payment\*[Title/Abstract] OR out of pocket spending OR out of pocket spending OR out of pocket spending OR indirect expenditure\*[Title/Abstract] OR expenditure\*[Title/Abstract] OR indirect cost\*[Title/Abstract] OR fear of cost\*[Title/Abstract] OR cost of treatment\*[Title/Abstract])

payment\*[Title/Abstract] OR out-of-pocket spending[Title/Abstract] OR out-of pocket spending[Title/Abstract] OR out of pocket spending[Title/Abstract] OR indirect expenditure\*[Title/Abstract] OR expenditure\*[Title/Abstract] OR indirect cost\*[Title/Abstract] OR fear of cost\*[Title/Abstract] OR cost of treatment[Title/Abstract])

Concept 1 AND Concept 2

((("Breast Neoplasms"[Mesh]) OR (breast cancer\*[Title/Abstract] OR breast neoplasm\*[Title/Abstract] OR breast tumour\*[Title/Abstract] OR breast tumor\*[Title/Abstract] OR breast carcinoma\*[Title/Abstract] OR carcinoma of the breast[Title/Abstract] OR carcinoma in situ[Title/Abstract] OR mammary cancer\*[Title/Abstract] OR cancer of breast[Title/Abstract] OR cancer of the breast[Title/Abstract])) AND (("Financial Stress"[Mesh] OR "Health Expenditures"[Mesh]) OR (Financial Stress\*[Title/Abstract] OR Financial Pressure\*[Title/Abstract] OR Financial Hardship\*[Title/Abstract] OR Financial Challenges\*[Title/Abstract] OR Financial burden\*[Title/Abstract] OR health expenditure\*[Title/Abstract] OR direct expenditure\*[Title/Abstract] OR out-of-pocket expenditure\*[Title/Abstract] OR out-of pocket expenditure\*[Title/Abstract] OR out of pocket expenditure\*[Title/Abstract] OR out-of-pocket expense\*[Title/Abstract] OR out-of pocket expense\*[Title/Abstract] OR out of pocket expense\*[Title/Abstract] OR out-of-pocket cost\*[Title/Abstract] OR out-of pocket cost\*[Title/Abstract] OR out of pocket cost\*[Title/Abstract] OR out-of-pocket payment\*[Title/Abstract] OR out-of pocket payment\*[Title/Abstract] OR out-of-pocket spending[Title/Abstract] OR out-of pocket spending[Title/Abstract] OR out of pocket spending[Title/Abstract] OR indirect expenditure\*[Title/Abstract] OR expenditure\*[Title/Abstract] OR indirect cost\*[Title/Abstract] OR fear of cost\*[Title/Abstract] OR cost of treatment[Title/Abstract]))

980 results

EMBASE

Concept 1 Breast Cancer  
Controlled Vocabulary  
'breast cancer'/exp

Synonyms/Keywords

breast cancer\* OR breast neoplasm\* OR breast tumour\* OR breast tumor\* OR breast carcinoma\* OR carcinoma of the breast OR carcinoma in situ OR mammary cancer\* OR cancer of breast OR cancer of the breast

Adjacency Searching

(breast\* NEAR/3 (cancer\* OR tumor\* OR tumour\* OR neoplasm\* OR adenocarcinoma\* OR carcinoma\* OR malignan\* OR 'in situ')):ti,ab,kw

Syntax

('breast cancer'/exp OR (breast\* NEAR/3 (cancer\* OR tumor\* OR tumour\* OR neoplasm\* OR adenocarcinoma\* OR carcinoma\* OR malignan\* OR 'in situ')):ti,ab,kw) OR 'breast cancer\*':ti,ab,kw OR 'breast neoplasm\*':ti,ab,kw OR 'breast tumour\*':ti,ab,kw OR 'breast tumor\*':ti,ab,kw OR 'breast carcinoma\*':ti,ab,kw OR 'carcinoma of the breast':ti,ab,kw OR 'carcinoma in situ':ti,ab,kw OR 'mammary cancer\*':ti,ab,kw OR 'cancer of breast':ti,ab,kw OR 'cancer of the breast':ti,ab,kw

## Concept 2

### Controlled Vocabulary

'financial stress'/exp OR 'financial burden'/exp OR 'out of pocket cost'/exp OR 'out of pocket expenditure'/exp OR 'out of pocket payment'/exp OR 'out of pocket spending'/exp OR 'treatment cost'/exp OR 'financial hardship'/exp OR 'health care cost'/exp

### Synonyms/Keywords

Financial Stress\* OR Financial Pressure\* OR Financial Hardship\* OR Financial Challenges\* OR Financial burden\* OR health expenditure\* OR direct expenditure\* OR out-of-pocket expenditure\* OR out-of-pocket expenditure\* OR out of pocket expenditure\* OR out-of-pocket expense\* OR out-of-pocket expense\* OR out of pocket expense\* OR out-of-pocket cost\* OR out-of-pocket cost\* OR out of pocket cost\* OR out-of-pocket payment\* OR out-of-pocket payment\* OR out of pocket payment\* OR out-of-pocket spending OR out-of-pocket spending OR out of pocket spending OR indirect expenditure\* OR expenditure\* OR indirect cost\* OR fear of cost\* OR cost of treatment OR capital expenditure\* OR direct service cost\* OR health expenditure\* OR healthcare expenditure\* OR health care expenditure\*

### Syntax

('financial stress'/exp OR 'financial burden'/exp OR 'out of pocket cost'/exp OR 'out of pocket expenditure'/exp OR 'out of pocket payment'/exp OR 'out of pocket spending'/exp OR 'treatment cost'/exp OR 'financial hardship'/exp OR 'health care cost'/exp) OR 'financial stress\*':ti,ab,kw OR 'financial pressure\*':ti,ab,kw OR 'financial hardship\*':ti,ab,kw OR 'financial challenges\*':ti,ab,kw OR 'financial burden\*':ti,ab,kw OR 'direct expenditure\*':ti,ab,kw OR 'out-of-pocket expenditure\*':ti,ab,kw OR 'out-of-pocket expenditure\*':ti,ab,kw OR 'out of pocket expenditure\*':ti,ab,kw OR 'out-of-pocket expense\*':ti,ab,kw OR 'out-of-pocket expense\*':ti,ab,kw OR 'out of pocket expense\*':ti,ab,kw OR 'out-of-pocket cost\* or out-of-pocket cost\*':ti,ab,kw OR 'out of pocket cost\*':ti,ab,kw OR 'out-of-pocket payment\*':ti,ab,kw OR 'out-of-pocket payment\*':ti,ab,kw OR 'out of pocket payment\*':ti,ab,kw OR 'out-of-pocket spending':ti,ab,kw OR 'out-of-pocket spending':ti,ab,kw OR 'out of pocket spending':ti,ab,kw OR 'indirect expenditure\*':ti,ab,kw OR expenditure\*:ti,ab,kw OR 'indirect cost\*':ti,ab,kw OR 'fear of cost\*':ti,ab,kw OR 'cost of treatment':ti,ab,kw OR 'capital expenditure\*':ti,ab,kw OR 'direct service cost\*':ti,ab,kw OR 'health expenditure\*':ti,ab,kw OR 'healthcare expenditure\*':ti,ab,kw OR 'health care expenditure\*':ti,ab,kw

## Concept 1 AND Concept 2

((('breast cancer'/exp OR (breast\* NEAR/3 (cancer\* OR tumor\* OR tumour\* OR neoplasm\* OR adenocarcinoma\* OR carcinoma\* OR malignan\* OR 'in situ')):ti,ab,kw) OR 'breast



cancer\*:ti,ab,kw OR 'breast neoplasm\*:ti,ab,kw OR 'breast tumour\*:ti,ab,kw OR 'breast tumor\*:ti,ab,kw OR 'breast carcinoma\*:ti,ab,kw OR 'carcinoma of the breast':ti,ab,kw OR 'carcinoma in situ':ti,ab,kw OR 'mammary cancer\*:ti,ab,kw OR 'cancer of breast':ti,ab,kw OR 'cancer of the breast':ti,ab,kw) AND (('financial stress'/exp OR 'financial burden'/exp OR 'out of pocket cost'/exp OR 'out of pocket expenditure'/exp OR 'out of pocket payment'/exp OR 'out of pocket spending'/exp OR 'treatment cost'/exp OR 'financial hardship'/exp OR 'health care cost'/exp) OR 'financial stress\*:ti,ab,kw OR 'financial pressure\*:ti,ab,kw OR 'financial hardship\*:ti,ab,kw OR 'financial challenges\*:ti,ab,kw OR 'financial burden\*:ti,ab,kw OR 'direct expenditure\*:ti,ab,kw OR 'out-of-pocket expenditure\*:ti,ab,kw OR 'out-of pocket expenditure\*:ti,ab,kw OR 'out of pocket expenditure\*:ti,ab,kw OR 'out-of-pocket expense\*:ti,ab,kw OR 'out-of pocket expense\*:ti,ab,kw OR 'out of pocket expense\*:ti,ab,kw OR 'out-of-pocket cost\* or out-of pocket cost\*:ti,ab,kw OR 'out of pocket cost\*:ti,ab,kw OR 'out-of-pocket payment\*:ti,ab,kw OR 'out-of pocket payment\*:ti,ab,kw OR 'out of pocket payment\*:ti,ab,kw OR 'out-of-pocket spending':ti,ab,kw OR 'out-of pocket spending':ti,ab,kw OR 'out of pocket spending':ti,ab,kw OR 'indirect expenditure\*:ti,ab,kw OR expenditure\*:ti,ab,kw OR 'indirect cost\*:ti,ab,kw OR 'fear of cost\*:ti,ab,kw OR 'cost of treatment':ti,ab,kw OR 'capital expenditure\*:ti,ab,kw OR 'direct service cost\*:ti,ab,kw OR 'health expenditure\*:ti,ab,kw OR 'healthcare expenditure\*:ti,ab,kw OR 'health care expenditure\*:ti,ab,kw)

Results 7721

Concept 1 AND Concept 2 WITHOUT health care cost controlled vocabulary term

((('breast cancer'/exp OR (breast\* NEAR/3 (cancer\* OR tumor\* OR tumour\* OR neoplasm\* OR adenocarcinoma\* OR carcinoma\* OR malignan\* OR 'in situ'))):ti,ab,kw) OR 'breast cancer\*:ti,ab,kw OR 'breast neoplasm\*:ti,ab,kw OR 'breast tumour\*:ti,ab,kw OR 'breast tumor\*:ti,ab,kw OR 'breast carcinoma\*:ti,ab,kw OR 'carcinoma of the breast':ti,ab,kw OR 'carcinoma in situ':ti,ab,kw OR 'mammary cancer\*:ti,ab,kw OR 'cancer of breast':ti,ab,kw OR 'cancer of the breast':ti,ab,kw) AND (('financial stress'/exp OR 'financial burden'/exp OR 'out of pocket cost'/exp OR 'out of pocket expenditure'/exp OR 'out of pocket payment'/exp OR 'out of pocket spending'/exp OR 'treatment cost'/exp OR 'financial hardship'/exp) OR 'financial stress\*:ti,ab,kw OR 'financial pressure\*:ti,ab,kw OR 'financial hardship\*:ti,ab,kw OR 'financial challenges\*:ti,ab,kw OR 'financial burden\*:ti,ab,kw OR 'direct expenditure\*:ti,ab,kw OR 'out-of-pocket expenditure\*:ti,ab,kw OR 'out-of pocket expenditure\*:ti,ab,kw OR 'out of pocket expenditure\*:ti,ab,kw OR 'out-of-pocket expense\*:ti,ab,kw OR 'out-of pocket expense\*:ti,ab,kw OR 'out-of-pocket cost\* or out-of pocket cost\*:ti,ab,kw OR 'out of pocket cost\*:ti,ab,kw OR 'out-of-pocket payment\*:ti,ab,kw OR 'out-of pocket payment\*:ti,ab,kw OR 'out of pocket payment\*:ti,ab,kw OR 'out-of-pocket spending':ti,ab,kw OR 'out-of pocket spending':ti,ab,kw OR 'out of pocket spending':ti,ab,kw OR 'indirect expenditure\*:ti,ab,kw OR expenditure\*:ti,ab,kw OR 'indirect cost\*:ti,ab,kw OR 'fear of cost\*:ti,ab,kw OR 'cost of treatment':ti,ab,kw OR 'capital expenditure\*:ti,ab,kw OR 'direct service cost\*:ti,ab,kw OR 'health expenditure\*:ti,ab,kw OR 'healthcare expenditure\*:ti,ab,kw OR 'health care expenditure\*:ti,ab,kw)

Results 1936

Global Health (EBSCO)

Concept 1

Controlled Vocabulary

DE "breast cancer"

Synonyms/Keywords

Syntax

DE "breast cancer" OR AB ( breast cancer\* OR breast neoplasm\* OR breast tumour\* OR breast tumor\* OR breast carcinoma\* OR carcinoma of the breast OR carcinoma in situ OR mammary cancer\* OR cancer of breast OR cancer of the breast ) OR TI ( breast cancer\* OR breast neoplasm\* OR breast tumour\* OR breast tumor\* OR breast carcinoma\* OR carcinoma of the breast OR carcinoma in situ OR mammary cancer\* OR cancer of breast OR cancer of the breast )

(DE ("breast cancer") OR TI (breast\* N3 (cancer\* OR tumor\* OR tumour\* OR neoplasm\* OR adenocarcinoma\* OR carcinoma\* OR malignan\* OR "in situ"))) OR AB (breast\* N3 (cancer\* OR tumor\* OR tumour\* OR neoplasm\* OR adenocarcinoma\* OR carcinoma\* OR malignan\* OR "in situ"))) OR AB ( breast cancer\* OR breast neoplasm\* OR breast tumour\* OR breast tumor\* OR breast carcinoma\* OR carcinoma of the breast OR carcinoma in situ OR mammary cancer\* OR cancer of breast OR cancer of the breast ) OR TI ( breast cancer\* OR breast neoplasm\* OR breast tumour\* OR breast tumor\* OR breast carcinoma\* OR carcinoma of the breast OR carcinoma in situ OR mammary cancer\* OR cancer of breast OR cancer of the breast)

Concept 2

Controlled Vocabulary

Synonyms/Keywords

Syntax

AB ( Financial Stress\* OR Financial Pressure\* OR Financial Hardship\* OR Financial Challenges\* OR Financial burden\* OR health expenditure\* OR direct expenditure\* OR out-of-pocket expenditure\* OR out-of pocket expenditure\* OR out of pocket expenditure\* OR out-of-pocket expense\* OR out-of pocket expense\* OR out of pocket expense\* OR out-of-pocket cost\* OR out-of pocket cost\* OR out of pocket cost\* OR out-of-pocket payment\* OR out-of pocket payment\* OR out of pocket payment\* OR out-of-pocket spending OR out-of pocket spending OR out of pocket spending OR indirect expenditure\* OR expenditure\* OR indirect cost\* OR fear of cost\* OR cost of treatment OR capital expenditure\* OR direct service cost\* OR health expenditure\* OR healthcare expenditure\* OR health care expenditure\* ) OR TI ( Financial Stress\* OR Financial Pressure\* OR Financial Hardship\* OR Financial Challenges\* OR Financial burden\* OR health expenditure\* OR direct expenditure\* OR out-of-pocket expenditure\* OR out-of pocket expenditure\* OR out of pocket expenditure\* OR out-of-pocket expense\* OR out-of pocket expense\* OR out of pocket expense\* OR out-of-pocket cost\* OR out-of pocket cost\* OR out of pocket cost\* OR out-of-pocket payment\* OR out-of pocket payment\* OR out-of-pocket spending OR out-of pocket spending

OR out of pocket spending OR indirect expenditure\* OR expenditure\* OR indirect cost\* OR fear of cost\* OR cost of treatment OR capital expenditure\* OR direct service cost\* OR health expenditure\* OR healthcare expenditure\* OR health care expenditure\* )

Concept 1 AND Concept 2

(DE ("breast cancer") OR TI (breast\* N3 (cancer\* OR tumor\* OR tumour\* OR neoplasm\* OR adenocarcinoma\* OR carcinoma\* OR malignan\* OR "in situ"))) OR AB (breast\* N3 (cancer\* OR tumor\* OR tumour\* OR neoplasm\* OR adenocarcinoma\* OR carcinoma\* OR malignan\* OR "in situ"))) OR AB ( breast cancer\* OR breast neoplasm\* OR breast tumour\* OR breast tumor\* OR breast carcinoma\* OR carcinoma of the breast OR carcinoma in situ OR mammary cancer\* OR cancer of breast OR cancer of the breast ) OR TI ( breast cancer\* OR breast neoplasm\* OR breast tumour\* OR breast tumor\* OR breast carcinoma\* OR carcinoma of the breast OR carcinoma in situ OR mammary cancer\* OR cancer of breast OR cancer of the breast)) AND (AB ( Financial Stress\* OR Financial Pressure\* OR Financial Hardship\* OR Financial Challenges\* OR Financial burden\* OR health expenditure\* OR direct expenditure\* OR out-of-pocket expenditure\* OR out-of pocket expenditure\* OR out of pocket expenditure\* OR out-of-pocket expense\* OR out-of pocket expense\* OR out of pocket expense\* OR out-of-pocket cost\* OR out-of pocket cost\* OR out of pocket cost\* OR out-of-pocket payment\* OR out-of pocket payment\* OR out of pocket payment\* OR out-of-pocket spending OR out-of pocket spending OR out of pocket spending OR indirect expenditure\* OR expenditure\* OR indirect cost\* OR fear of cost\* OR cost of treatment OR capital expenditure\* OR direct service cost\* OR health expenditure\* OR healthcare expenditure\* OR health care expenditure\* ) OR TI ( Financial Stress\* OR Financial Pressure\* OR Financial Hardship\* OR Financial Challenges\* OR Financial burden\* OR health expenditure\* OR direct expenditure\* OR out-of-pocket expenditure\* OR out-of pocket expenditure\* OR out of pocket expenditure\* OR out-of-pocket expense\* OR out-of pocket expense\* OR out of pocket expense\* OR out-of-pocket cost\* OR out-of pocket cost\* OR out of pocket cost\* OR out-of-pocket payment\* OR out-of pocket payment\* OR out of pocket payment\* OR out-of-pocket spending OR out-of pocket spending OR out of pocket spending OR indirect expenditure\* OR expenditure\* OR indirect cost\* OR fear of cost\* OR cost of treatment OR capital expenditure\* OR direct service cost\* OR health expenditure\* OR healthcare expenditure\* OR health care expenditure\* ))

287 results

Global Index Medicus

Concept 1

"breast cancer\*" OR "breast neoplasm\*" OR "breast tumour\*" OR "breast tumor\*" OR "breast carcinoma\*" OR "carcinoma of the breast" OR "carcinoma in situ" OR "mammary cancer\*" OR "cancer of breast " OR "cancer of the breast"

Concept 2

"Financial Stress\*" OR "Financial Pressure\*" OR "Financial Hardship\*" OR "Financial Challenges\*" OR "Financial burden\*" OR "health expenditure\*" OR "direct expenditure\*" OR "out-of-pocket expenditure\*" OR "out-of pocket expenditure\*" OR "out of pocket expenditure\*" OR "out-of-pocket expense\*" OR "out-of pocket expense\*" OR "out of pocket expense\*" OR "out-of-pocket cost\*" OR "out-of pocket cost\*" OR "out of pocket cost\*" OR "out-of-pocket

payment\*" OR "out-of pocket payment\*" OR "out of pocket payment\*" OR "out-of-pocket spending" OR "out-of pocket spending" OR "out of pocket spending" OR "indirect expenditure\*" OR "expenditure\*" OR "indirect cost\*" OR "fear of cost\*" OR "cost of treatment"

("breast cancer\*" OR "breast neoplasm\*" OR "breast tumour\*" OR "breast tumor\*" OR "breast carcinoma\*" OR "carcinoma of the breast" OR "carcinoma in situ" OR "mammary cancer\*" OR "cancer of breast " OR "cancer of the breast") AND ("Financial Stress\*" OR "Financial Pressure\*" OR "Financial Hardship\*" OR "Financial Challenges\*" OR "Financial burden\*" OR "health expenditure\*" OR "direct expenditure\*" OR "out-of-pocket expenditure\*" OR "out-of-pocket expenditure\*" OR "out of pocket expenditure\*" OR "out-of-pocket expense\*" OR "out-of-pocket expense\*" OR "out of pocket expense\*" OR "out-of-pocket cost\*" OR "out-of-pocket cost\*" OR "out of pocket cost\*" OR "out-of-pocket payment\*" OR "out-of-pocket payment\*" OR "out of pocket payment\*" OR "out-of-pocket spending" OR "out-of-pocket spending" OR "out of pocket spending" OR "indirect expenditure\*" OR "expenditure\*" OR "indirect cost\*" OR "fear of cost\*" OR "cost of treatment")

7950 results (3080 in English)

("breast cancer\*" OR "breast neoplasm\*" OR "breast tumour\*" OR "breast tumor\*" OR "breast carcinoma\*" OR "carcinoma of the breast" OR "carcinoma in situ" OR "mammary cancer\*" OR "cancer of breast " OR "cancer of the breast") AND ("out-of-pocket expenditure\*" OR "out-of-pocket expenditure\*" OR "out of pocket expenditure\*" OR "out-of-pocket expense\*" OR "out-of-pocket expense\*" OR "out of pocket expense\*" OR "out-of-pocket cost\*" OR "out-of-pocket cost\*" OR "out of pocket cost\*" OR "out-of-pocket payment\*" OR "out-of-pocket payment\*" OR "out of pocket payment\*" OR "out-of-pocket spending" OR "out-of-pocket spending" OR "out of pocket spending")

("breast cancer\*" OR "breast neoplasm\*" OR "breast tumour\*" OR "breast tumor\*" OR "breast carcinoma\*" OR "carcinoma of the breast" OR "carcinoma in situ" OR "mammary cancer\*" OR "cancer of breast " OR "cancer of the breast") AND ("out-of-pocket")

8 results

("breast cancer\*" OR "breast neoplasm\*" OR "breast tumour\*" OR "breast tumor\*" OR "breast carcinoma\*" OR "carcinoma of the breast" OR "carcinoma in situ" OR "mammary cancer\*" OR "cancer of breast " OR "cancer of the breast") AND ("out-of-pocket" OR "financial stress" OR "health expenditure" )

11

**eFigure 1.** Forest Plot for Financial Toxicity Rate, Subgrouped by Study Quality Ratings Among High-Income Countries (HICs)

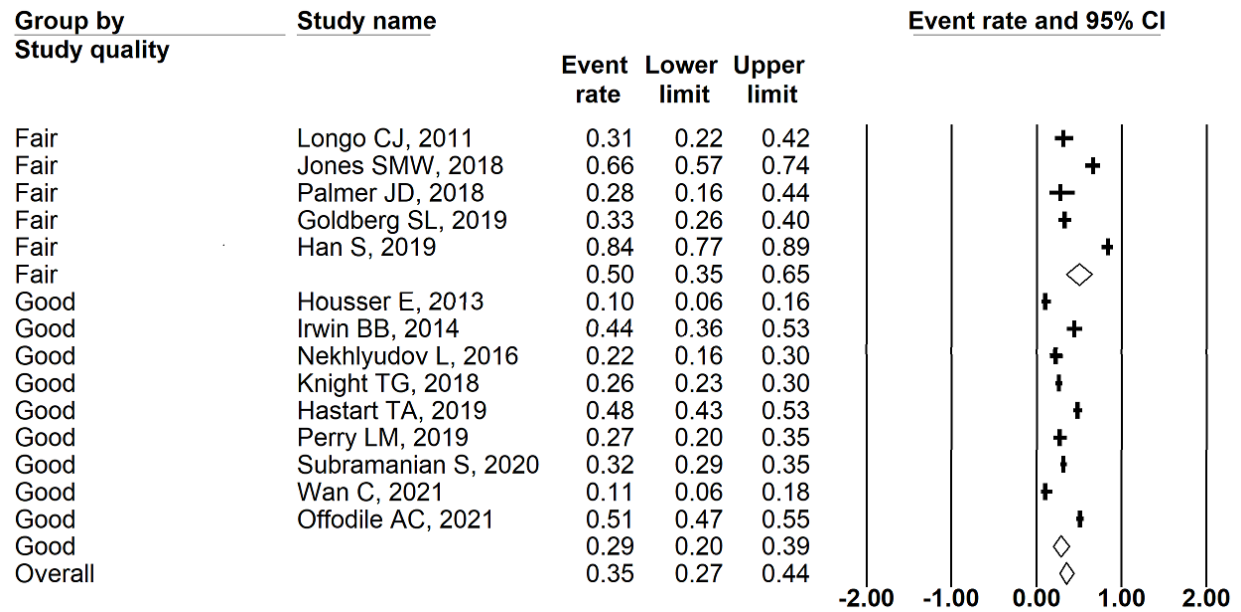

Solid squares represent the rate of financial toxicity reported by each study; horizontal lines denote 95% confidence intervals (CIs). The center of the diamonds represents the pooled rate for financial toxicity for each subgroup and the width represents the respective 95% CI. The size of the solid squares is proportional to the weight of the study. P-value comparing both groups: <0.001.

**eFigure 2.** Funnel Plot of Standard Error by Logit Event Rate for Studies Reporting High-Income Countries (HICs)

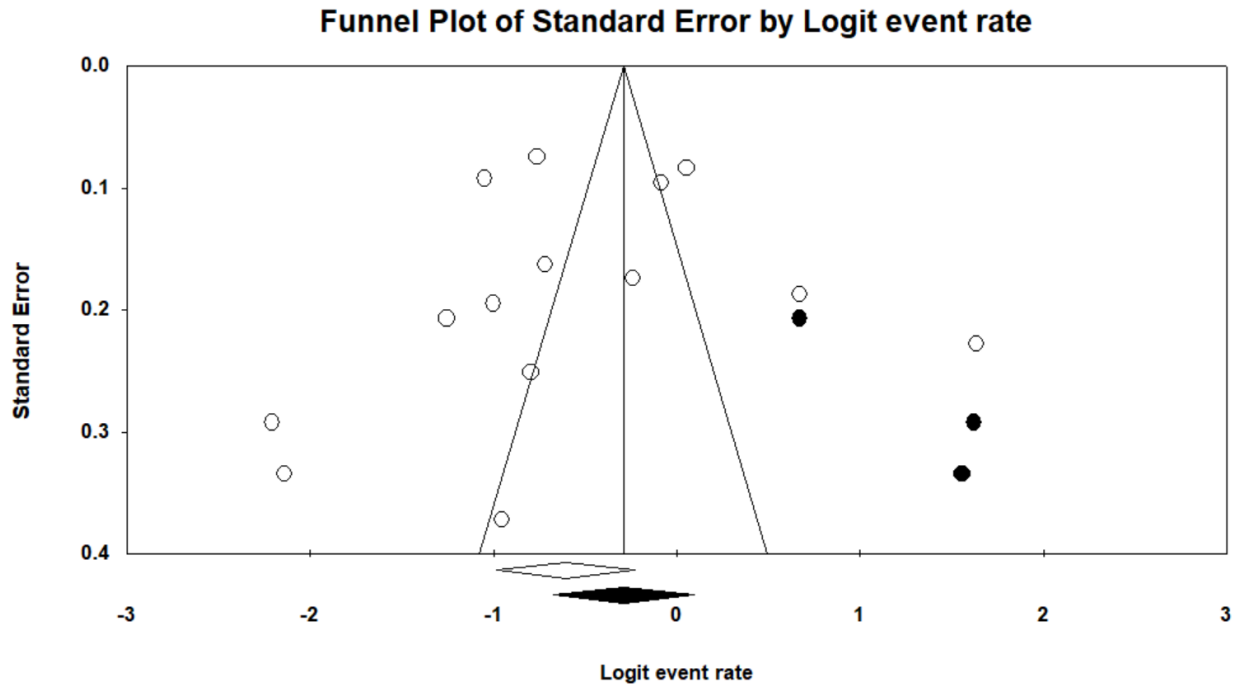

The vertical solid line is drawn at the pooled logit of the financial toxicity (FT) rate, and the other two lines represent the expected 95% confidence interval for a given standard error. The funnel plot visually showed a slight asymmetry towards the right of the pooled point estimate for studies conducted in HICs; however, both Begg's rank correlation test ( $p=0.62$ ) and Egger's linear regression test ( $p=0.68$ ) indicated no small study bias.
